# Supplementary material for: Factors Associated with False Positive Results on Screening Mammography in a Population of Predominantly Hispanic Women
Source: Oxford University Press journal article supplement (doi:10.1158/1055-9965.epi-17-0009), 2018-01-30
Supplement: 10559965epi170009-sup-176853_2_supp_3994097_1t3b7q.docx [file 10559965epi170009-sup-176853_2_supp_3994097_1t3b7q.docx]

**Supplemental Table 1.** Baseline characteristics of the Know Your Risk: Assessment at Screening (KYRAS) study sample (N=2019) compared to the remaining screened cohort not enrolled in the KYRAS study, New York, NY (November 2014-October 2015)

| **Characteristic**  N (%) | **KYRAS Sample**  N=2019 | **Screened Cohort**  **Not Enrolled in KYRAS**  N=10,186 |  |
| --- | --- | --- | --- |
| Age, years  Less than 50 years old  50 years or older  Race/ethnicity*  Hispanic  Non-Hispanic white  Non-Hispanic black  Other  Missing  Body mass index, kg/m2*  Underweight (<18.5)  Normal weight (18.5-24.9)  Overweight (25-29.9)  Obese (≥30)  Missing  Breast density**  Low breast density  High breast density  Breast cancer risk status***  Low or average risk  High risk  Missing | 460 (22.8)  1559 (77.2)  1542 (76.4)  204 (10.1)  194 (9.6)  79 (3.9)  0  31 (1.5)  562 (27.8)  724 (35.9)  702 (34.8)  0  1410 (69.8)  609 (30.2)  1187 (58.8)  496 (24.6)  336 (16.7) | 2213 (21.7)  7973 (78.3)  4201 (41.2)  1303 (12.8)  859 (8.4)  747 (7.3)  3076 (30.2)  68 (0.7)  1549 (15.2)  1936 (19.0)  2154 (21.2)  4479 (44.0)  6902 (67.8)  3279 (32.2)  6173 (60.6)  2592 (25.4)  1421 (14.0) |  |
|  |  |  |  |
|  |  |  |  |

* Missing data on race/ethnicity and body mass index in the electronic health record is labeled as “Missing.” If missing data is excluded, then the distributions in both groups are comparable.

** Breast density was dichotomized as low [almost entirely fatty (<25% density) or scattered areas of fibroglandular density (25-50%)] or high [heterogeneously dense (51-75%) or “extremely dense” (>75%)]

*** High breast cancer risk status was determined as having greater than 1.66% 5-year risk based upon the Breast Cancer Surveillance Consortium (BCSC) model, which accounts for age, race/ethnicity, benign breast disease, first-degree family history of breast cancer, and mammographic density. We used this breast cancer risk assessment tool rather than the Gail model, because we were able to extract data on reproductive factors from the electronic health record for the entire screened cohort. We excluded women with age <35 or >74 or those with a personal history of breast cancer, where we were unable to calculate their BCSC risk score.
